# Supplementary material for: Tocilizumab versus sarilumab among adults hospitalised with COVID-19: target trial emulation across England and Scotland
Source: Research Square preprint supplement (doi:10.21203/rs.3.rs-7702834/v1), 2025-10-01
Supplement: Supplementary file 1 [file 1cfc546e74b058061880c585.docx]

**APPENDIX**

**Tocilizumab versus sarilumab among adults hospitalised with COVID-19: target trial emulation across England and Scotland**

Bang Zheng1,2,#, Amanj Kurdi3,4,5,6,7,#, Alain Amstutz8,9,10,#, Amelia Green11, Emily Herrett2, John Tazare12, Qing Wen2,13, Viyaasan Mahalingasivam2, Rebecca Smith11, The OpenSAFELY Collaborative, Brian MacKenna11, Amir Mehrkar11, Seb Bacon11, Ben Goldacre11, Chris Robertson14, Aziz Sheikh11,15,*, Laurie Tomlinson2,*

# Co-first authors

* Co-corresponding authors

**Affiliations:**

1 Department of Epidemiology & Biostatistics, Peking University, Beijing, China

2 Department of Non-communicable Disease Epidemiology, London School of Hygiene and Tropical Medicine, London, UK

3 Strathclyde Institute of Pharmacy and Biomedical Sciences, University of Strathclyde, Glasgow, UK

4 Public Health Scotland, Scotland, UK.

5 College of Pharmacy, Hawler Medical University, Erbil, Kurdistan Region, Iraq.

6 Al-Kitab University, Kirkuk 36015, Iraq.

7 Department of Public Health Pharmacy and Management, School of Pharmacy, Sefako Makgatho Health Sciences University, Pretoria, South Africa

8 Population Health Sciences, Bristol Medical School, University of Bristol, Bristol, UK

9 Oslo Center for Biostatistics and Epidemiology, Oslo University Hospital, Oslo, Norway

10 Division Clinical Epidemiology, Department of Clinical Research, University Hospital Basel and University of Basel, Basel, Switzerland

11 Nuffield Department of Primary Care Health Sciences, University of Oxford, UK

12 Department of Medical Statistics, London School of Hygiene and Tropical Medicine, London, UK

13 Centre for Public Health, School of Medicine, Dentistry and Biomedical Sciences, Queen’s University Belfast, Belfast, UK

14 Department of Mathematics and Statistics, University of Strathclyde, Glasgow, UK

15 Usher Institute, University of Edinburgh, Edinburgh, UK

###

### **Appendix Table S1:** Target trial specification and emulation

| **Protocol element** | **Hypothetical pragmatic target trial** | **Target trial emulation**, done separately for OpenSAFELY and EAVE II | **Notes** |
| --- | --- | --- | --- |
| **Eligibility criteria** | Inclusion criteria:   1. Aged 18-110 years at enrolment 2. Hospitalised due to COVID-19 3. Receiving dexamethasone or an equivalent corticosteroid unless contraindicated 4. Requiring respiratory support or having hypoxaemia with evidence of inflammation   Exclusion criteria:   1. Hypersensitivity to IL-6 inhibitors 2. Baseline ALT/AST >5x ULN 3. Platelet count <150 x 10^3/μl | *Same as for the target trial, except:*   - In OpenSAFELY: COVID-related admissions were directly extracted from the COVID-19 therapeutics dataset - In EAVE II: COVID-related admissions were identified as those occurring within 28 days of a positive RT-PCR test or those hospital admission with an ICD-10 code for COVID-19 (U07.1 and U07.2) in their admission record (in SMR01 and/or RAPID) - Data on respiratory support, corticosteroid use and listed exclusion criteria are not consistently available across the two data platforms, but we assumed that receiving an IL-6 indicated there was no contraindication to these | In addition, we applied data quality assurance criteria: We excluded individuals with a) missing information on sex or region, and b) who received tocilizumab and sarilumab on the same date |
| **Treatment strategies** | Eligible participants are randomised to either:   1. Tocilizumab: a single 60-minute intravenous infusion of 8 mg/kg 2. Sarilumab: a single 60-minute intravenous infusion of 400 mg | *Same as for the target trial* | We only considered the first prescription to any of the two treatments.  In OpenSAFELY, this was ascertained from the COVID-19 therapeutics dataset based on the national Blueteq system, while in EAVE II this was ascertained from HEPMA. |
| **Treatment allocation** | Eligible participants are randomly assigned to one of the two groups, and are aware of which group they were assigned to (open-label). | *Same as for the target trial, except:*  We assumed randomisation conditional on the following baseline covariates: age, sex, region, calendar time, ethnicity (grouped into five broad categories: White, Black or Black British, Asian or Asian British, Mixed, Other), Index of Multiple Deprivation ([IMD], as quintiles derived from the patient’s postcode at lower super output area level), COVID-19 vaccination status (unvaccinated, one vaccination, two vaccinations, or three or more), SARS-CoV-2 re-infection status (positive test or clinical diagnosis code or exposure to COVID-19 drug at least three months prior), body mass index ([BMI], most recent record), previous use of other COVID-19 treatments, diabetes, hypertension, chronic heart diseases, chronic respiratory diseases, moderate/severe renal disease, severe liver disease, solid cancer, hematological disease, immunosuppressive disease or treatment, and solid organ transplant. | Covariates were identified based on previous literature, discussions with domain experts and data availability in each database.  Comorbidities were extracted through SNOMED CT codes in primary care records and ICD-10 in secondary care records. Ethnicity was extracted through SNOMED CT codes and supplemented with information from secondary care records.  Considering the sample size and data availability in the EAVE II database, the following baseline covariates were excluded in EAVE II: SARS-CoV-2 re-infection status, previous use of other COVID-19 treatments, solid cancer, immunosuppressive disease or treatment, and solid organ transplant |
| **Outcomes** | Primary:   - All-cause mortality within 28 days   Secondary:   - All-cause mortality within 90 days - Time to hospital discharge within 28 days | *Same as for the target trial* | Mortality data extracted from the ONS mortality database in OpenSAFELY and from the NRS mortality database in EAVE II.  Time to hospital discharge extracted from the linked secondary care records. |
| **Follow-up** | Primary:   - Each participant will be followed up until death, or end of 28-day follow-up, whichever occurs first.   Secondary:   - 90-day mortality: Same as for primary endpoint - Time to hospital discharge: Each participant will be followed up until hospital discharge, death, or end of 28-day follow-up, whichever occurs first. | *Same as for the target trial* | For the time to discharge outcome, deaths will be treated as a censoring event with worst outcome imputation, to account for the competing risk. |
| **Causal contrast** | Intention-to-treat effect  Per-protocol effect, i.e., the effect if all individuals had received the treatment they were assigned/prescribed to at baseline. | Observational analogue of the per-protocol effect: “Effect of receiving 1 dose of tocilizumab vs receiving 1 dose of sarilumab among adults hospitalised due to COVID-19 between July 1, 2021 and February 28, 2022” | Only information on treatment prescription is available, therefore, we estimate a per-protocol effect. However, in the case of an intravenous in-hospital treatment among severely ill patients it is reasonable to assume that everyone received the intended treatment and thus this closely corresponds to an intention-to-treat effect. |
| **Statistical analysis** | Hazard ratios comparing the two groups, using a Cox model with follow-up time as the time scale and stratified by region.  Subgroup analyses to assess treatment interactions: Dominant circulating variant of concern (delta variant before December 6, 2021, versus omicron BA.1 variant thereafter), COVID-19 vaccination status (none versus one or more vaccinations), age group (below 60 vs 60 years and above), sex (female versus male), ethnicity (white versus non-white), BMI (below 30 versus 30 or above), and presence versus absence of comorbidities (solid cancer, hematological disease, immunosuppressive treatment, diabetes, hypertension, chronic cardiac disease, and chronic respiratory disease). | *Same as for the target trial, except:*  adjusting for the above-mentioned covariates in the Cox model. |  |

###

### **Appendix Figure S1:** Love Plot: Standardized mean differences before and after weighting


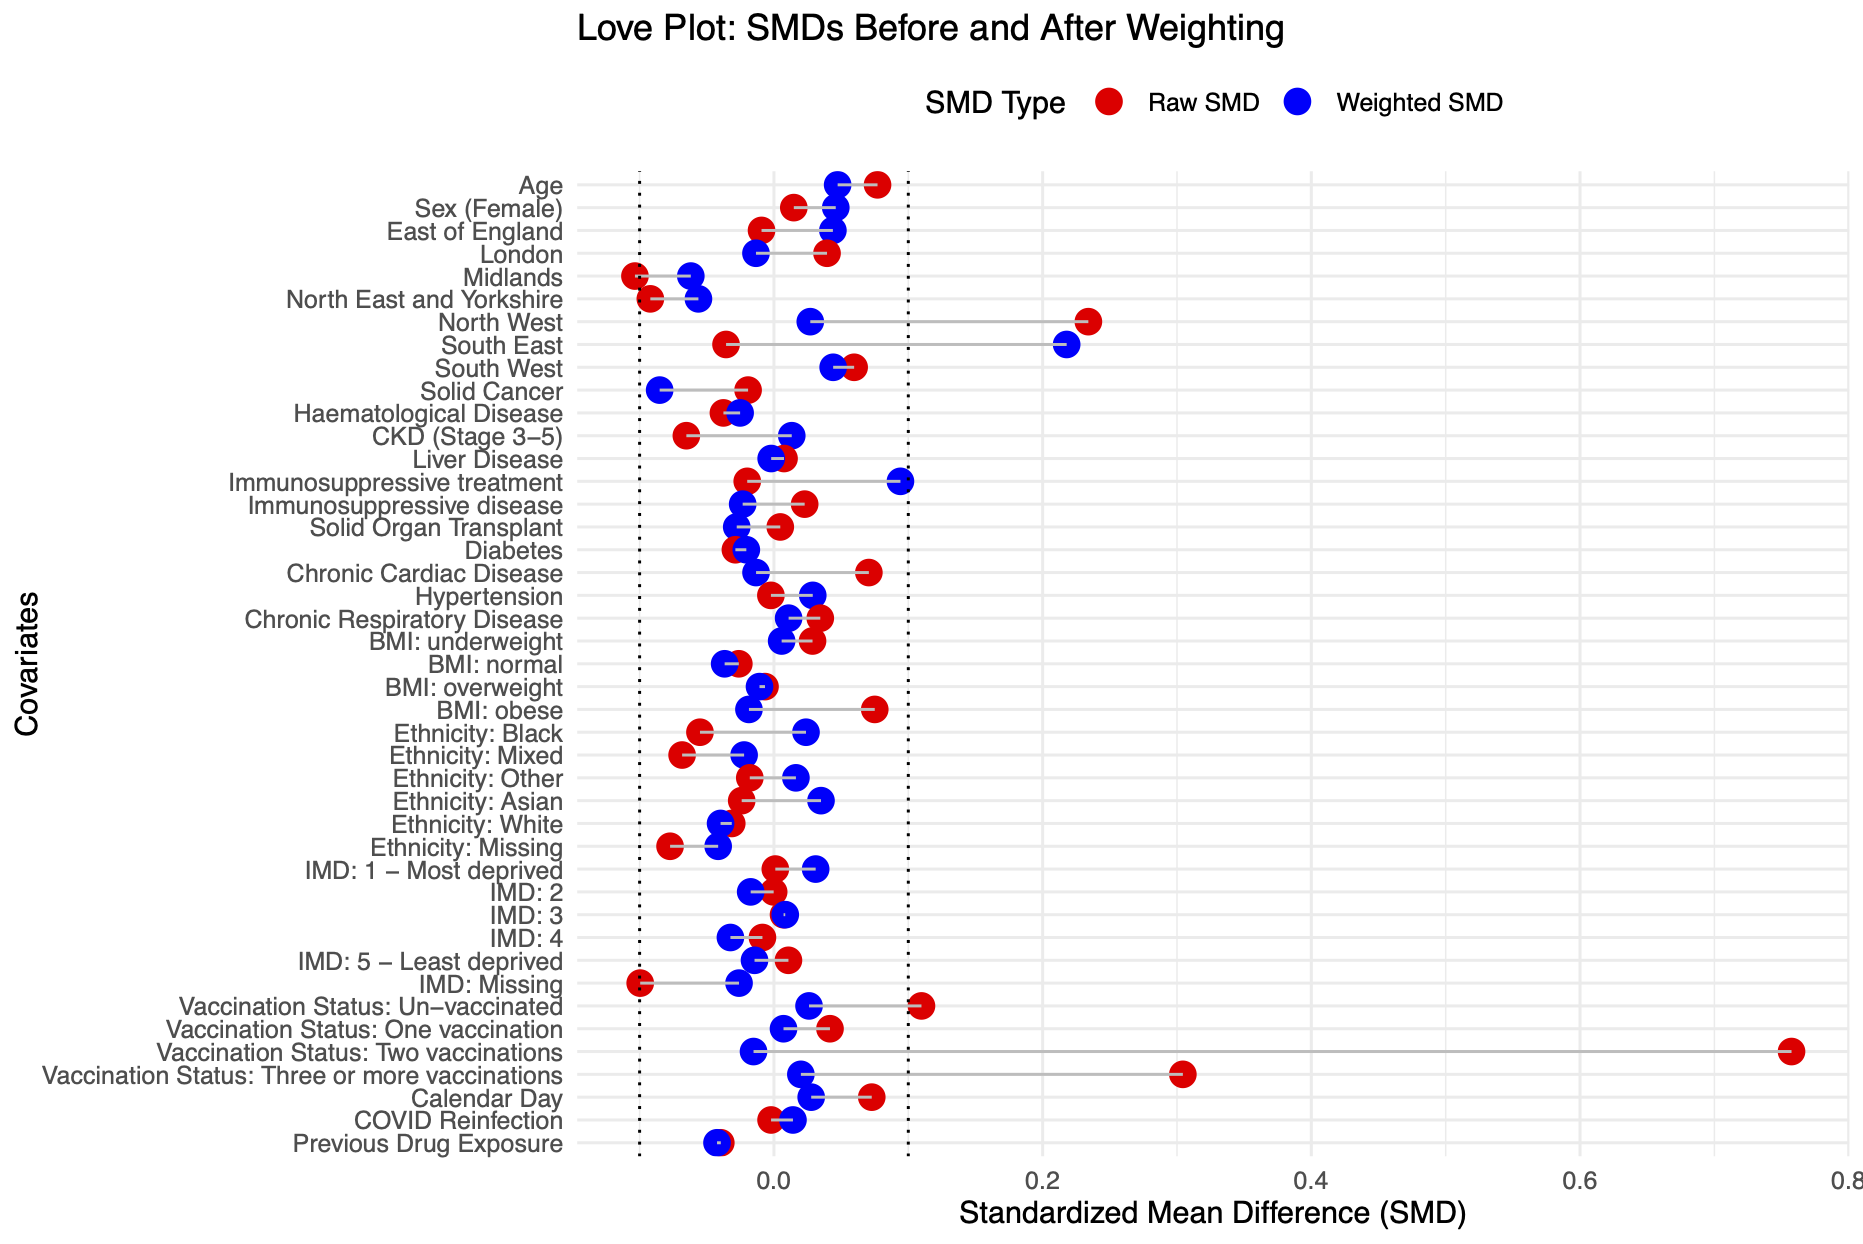


#

# 
